# Supplementary material for: Ultrafast dynamics in LMCT and intraconfigurational excited states in hexahaloiridates(iv), models for heavy transition metal complexes and building blocks of quantum correlated materials
Source: Royal Society of Chemistry journal article supplement (doi:10.1039/d0cp00438c), 2020-01-01
Supplement: d0cp00438c1.pdf [file d0cp00438c1.pdf]

## SUPPORTING INFORMATION

### **Ultrafast dynamics in LMCT and intraconfigurational excited states in hexahaloiridates(IV), models for heavy transition metal complexes and building blocks of quantum correlated materials**

Darya S. Budkina,<sup>a,b</sup> Firew T. Gemedo,<sup>a</sup> Sergey M. Matveev,<sup>a,c</sup> and Alexander N. Tarnovsky<sup>a,†</sup>

*<sup>a</sup> Department of Chemistry and Center for Photochemical Sciences, Bowling Green State*

*University, Bowling Green, OH, 43402, USA*

*<sup>b</sup> Present address: School of Chemistry and Biochemistry, University of Geneva, 1211 Geneva 4,  
Switzerland*

*<sup>c</sup> Present address: Department of Chemistry, University of Illinois at Urbana-Champaign,  
Champaign-Urbana, Illinois 61801, USA*

*† E-mail: atarnov@bgsu.edu.*

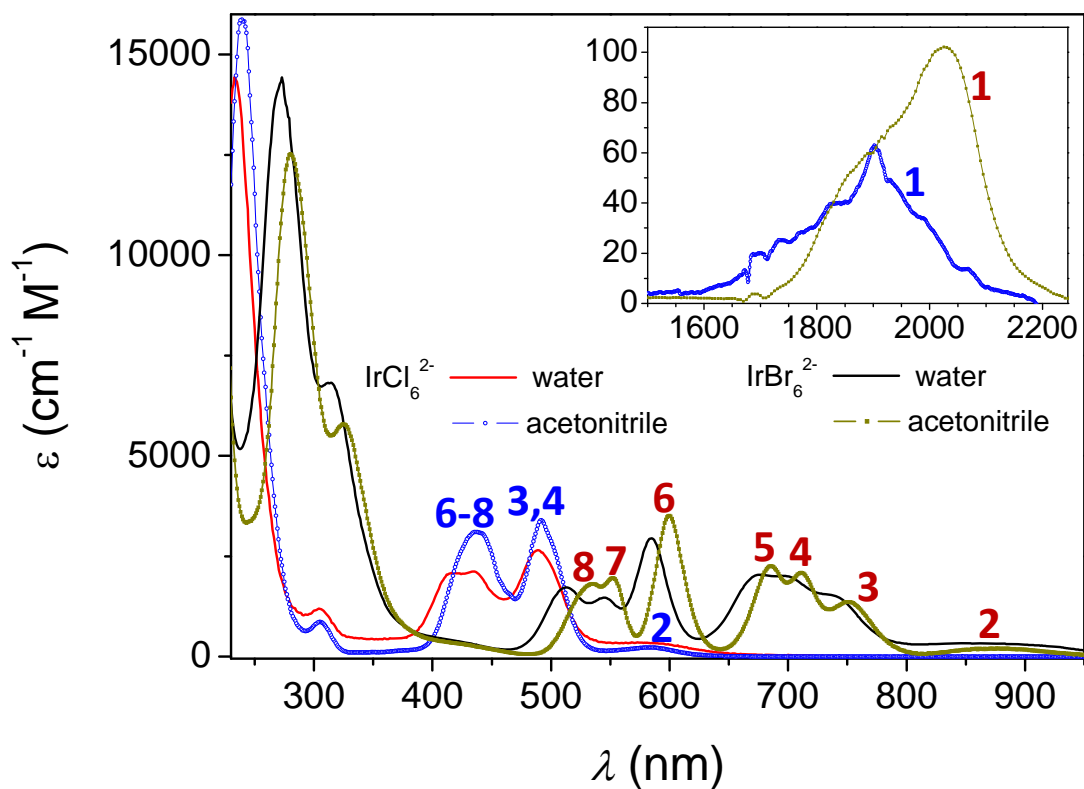

**Figure S1.** The comparison of the steady-state absorption spectra (extinction coefficient,  $\epsilon$ ) of  $\text{IrCl}_6^{2-}$  and  $\text{IrBr}_6^{2-}$  in acetonitrile and water. The inset shows the  $E_g'' \rightarrow U_g'$  intraconfigurational absorption band for  $\text{IrCl}_6^{2-}$  (blue open symbols) and  $\text{IrBr}_6^{2-}$  (dark yellow solid symbols) in acetonitrile. Electronic transitions of  $\text{IrCl}_6^{2-}$  and  $\text{IrBr}_6^{2-}$  are numbered 1-8 for spectral assignments; see Table 1 in the main text.

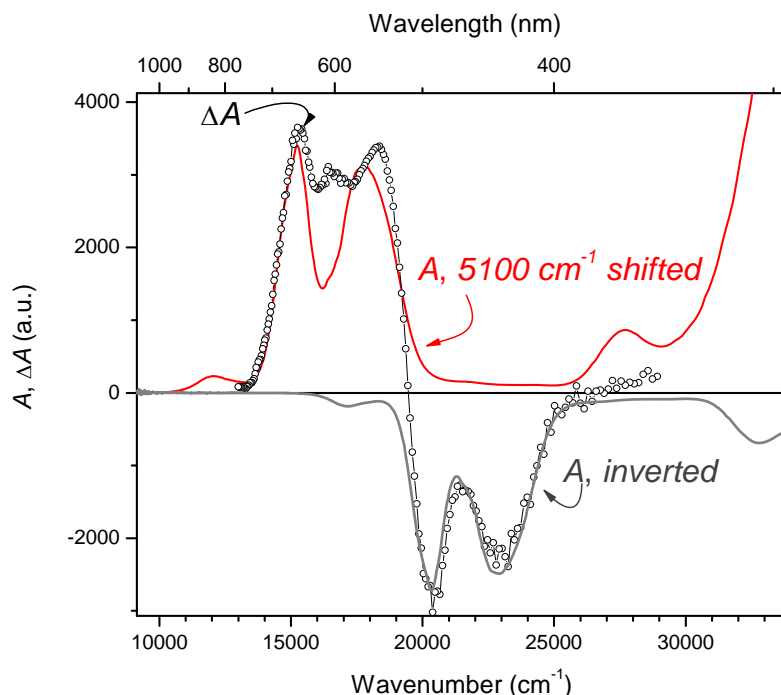

**Figure S2.**  $\text{IrCl}_6^{2-}$  in acetonitrile: the positions of two intense 655- and 544-nm  $\Delta A$  bands (20 ps, 600-nm excitation) match the positions of the  $\sim 492$  and  $\sim 437$  nm steady-state absorption bands when the steady-state spectrum is shifted (red line) by the energy gap ( $5100\text{ cm}^{-1}$ ) between the ground and the first-excited intraconfigurational states. This suggests that the 655 and 544 nm bands are due to ESA from the intraconfigurational state into the same excited states reached upon 492 and 437 nm transitions from the ground state. The grey line depicts the steady-state absorption spectrum of  $\text{IrCl}_6^{2-}$  in acetonitrile, which when inverted and scaled to the ground-state bleach in the 20 ps  $\Delta A$  spectrum, is superimposable with the latter. This suggests that ground-state bleach predominates over ESA within the region of negative  $\Delta A$  signals. Because ground-state bleach exhibits only minor spectral changes from the shortest to the longest delay times at all excitation wavelengths studied, one can conclude that  $\Delta A$  signals within the ground-state bleach region report exclusively on the repopulation of the ground electronic state and are not sensitive to the population transitions between the excited states.

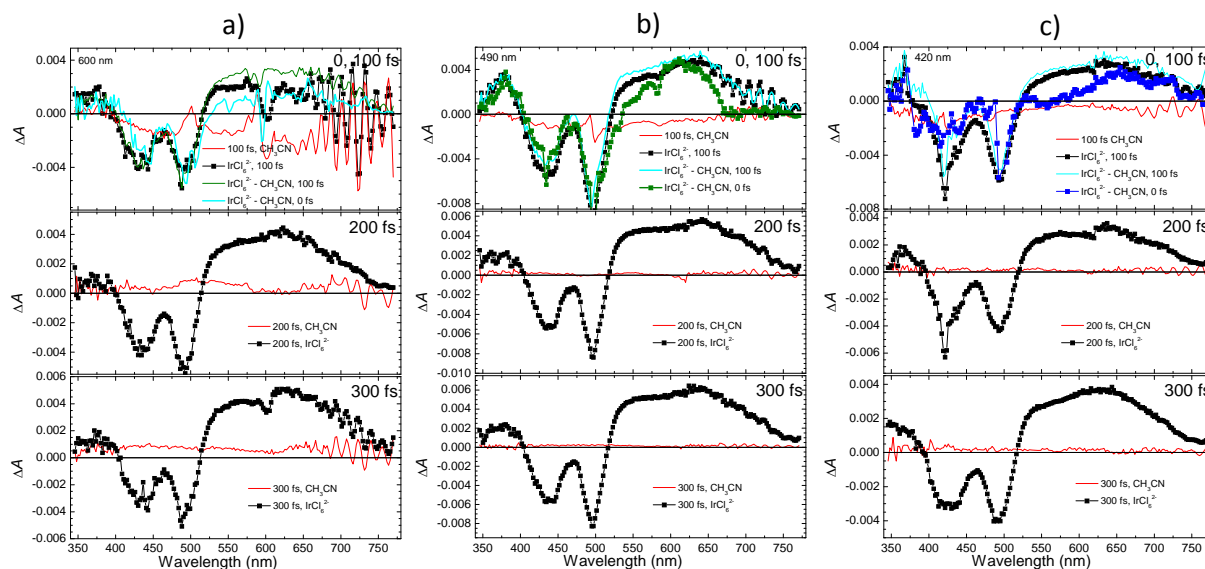

**Figure S3.** The comparison of short-time (0-300 fs)  $\Delta A$  signals for  $\text{IrCl}_6^{2-}$  in acetonitrile solutions and neat acetonitrile measured under identical conditions following excitation at 600 nm (a), 490 nm (b), and 420 nm (c). The 0 (not shown) and 100 fs (shown as lines)  $\Delta A$  signals of neat  $\text{CH}_3\text{CN}$  were scaled to account for the solute absorbance at a given excitation wavelength and subtracted from the solution  $\Delta A$  data. The top panels show the resulting 0 and 100 fs  $\Delta A$  spectra, where the 100 fs spectra (shown before and after the subtraction) illustrate the effect of the subtraction. The acetonitrile  $\Delta A$  signals at 200 and 300 fs (lines) were much smaller than the corresponding  $\Delta A$  signals from the solution (symbols), so that the solvent contribution at these delay times was concluded to be negligibly small. For delay times longer than 300 fs, the 600, 490, and 420 nm excitation of neat acetonitrile yielded zero  $\Delta A$  signals.

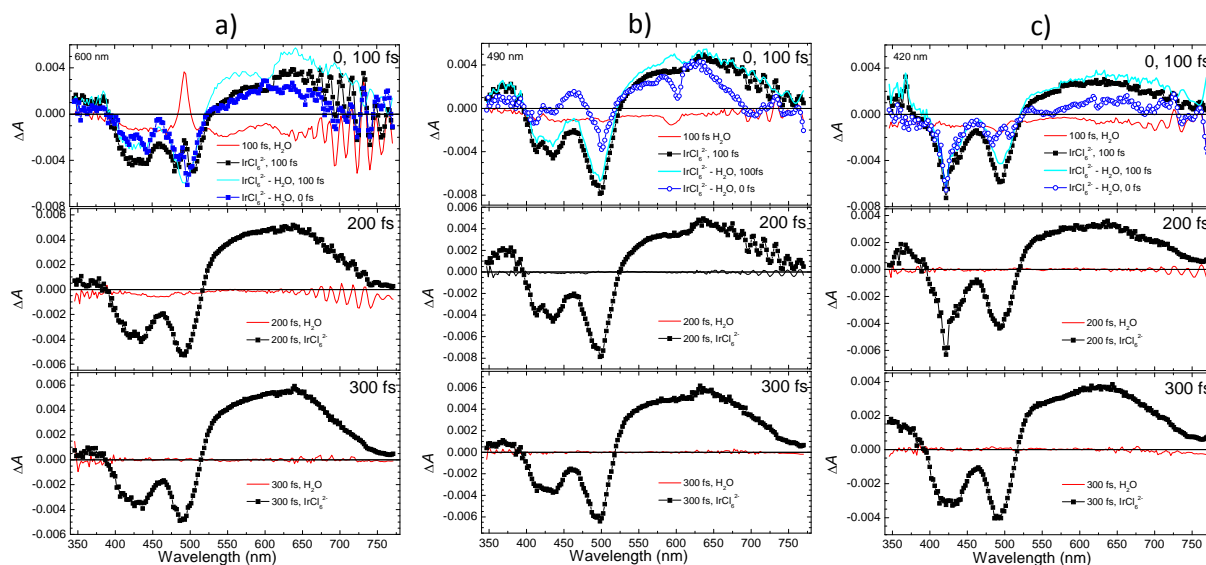

**Figure S4.** The comparison of short-time  $\Delta A$  signals for aqueous  $\text{IrCl}_6^{2-}$  and neat water measured under identical conditions following excitation at 600 nm (a), 490 nm (b), and 420 nm (c). The 0 (not shown) and 100 fs (shown as lines)  $\Delta A$  signals of neat water were scaled to account for the solute absorbance at a given excitation wavelength and subtracted from the solution  $\Delta A$  data. The top panels show the resulting 0 and 100 fs  $\Delta A$  spectra, where the 100 fs spectra (shown before and after the subtraction) illustrate the effect of the subtraction. Because water  $\Delta A$  signals (lines) were much smaller than the  $\Delta A$  signals from the solution (symbols) at 200 and 300 fs, the solvent contribution at these delay times was concluded to be negligibly small. For delay times longer than 300 fs, the 600, 490, and 420 nm excitation of neat water yielded zero  $\Delta A$  signals.

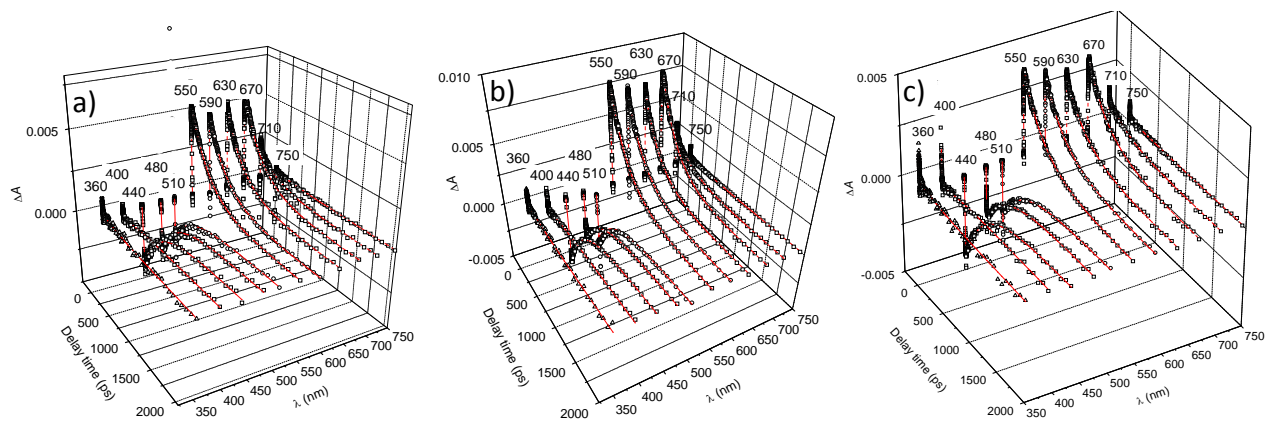

**Figure S5.** Representative transient absorption kinetic traces (symbols) of  $\text{IrCl}_6^{2-}$  in acetonitrile following excitation at 600 nm (a), 490 nm (b), and 420 nm (c). The probe wavelengths (nm) are shown besides each kinetic trace. Multiexponential fits resulting from the global analysis described in the main text are shown as solid red lines.

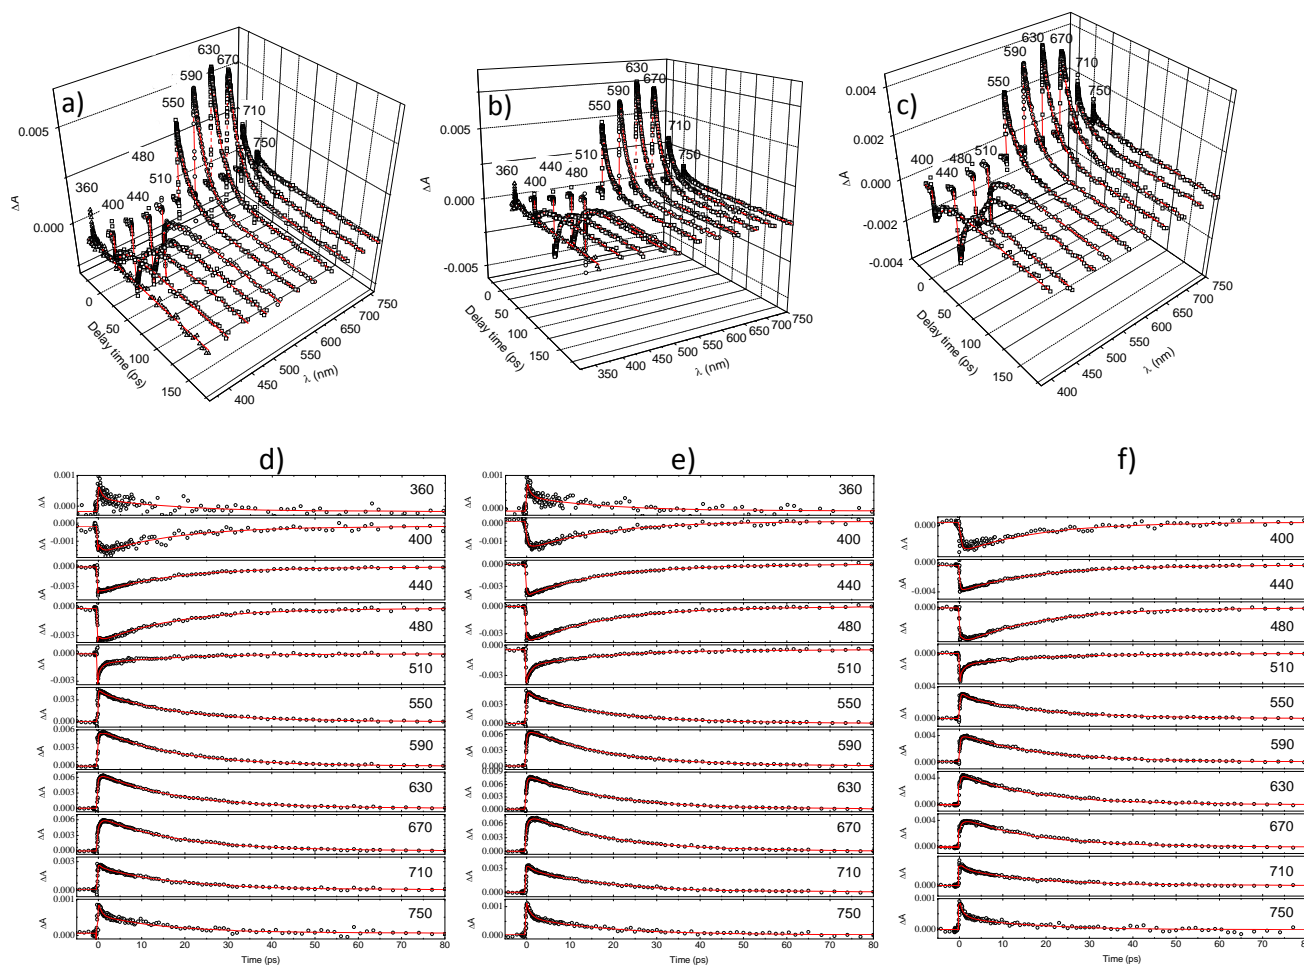

**Figure S6.** Representative transient absorption kinetic traces (symbols) of aqueous  $\text{IrCl}_6^{2-}$  following excitation at 600 nm (a), 490 nm (b), and 420 nm (b). The probe wavelengths (nm) are shown besides each kinetic trace. Multiexponential fits resulting from the global analysis as described in the main text are shown as solid red lines. Panels d), e), and f) show conventional two-dimensional plots of transient absorption as a function of the time delay for 600-, 490-, and 420-nm excitation, respectively.

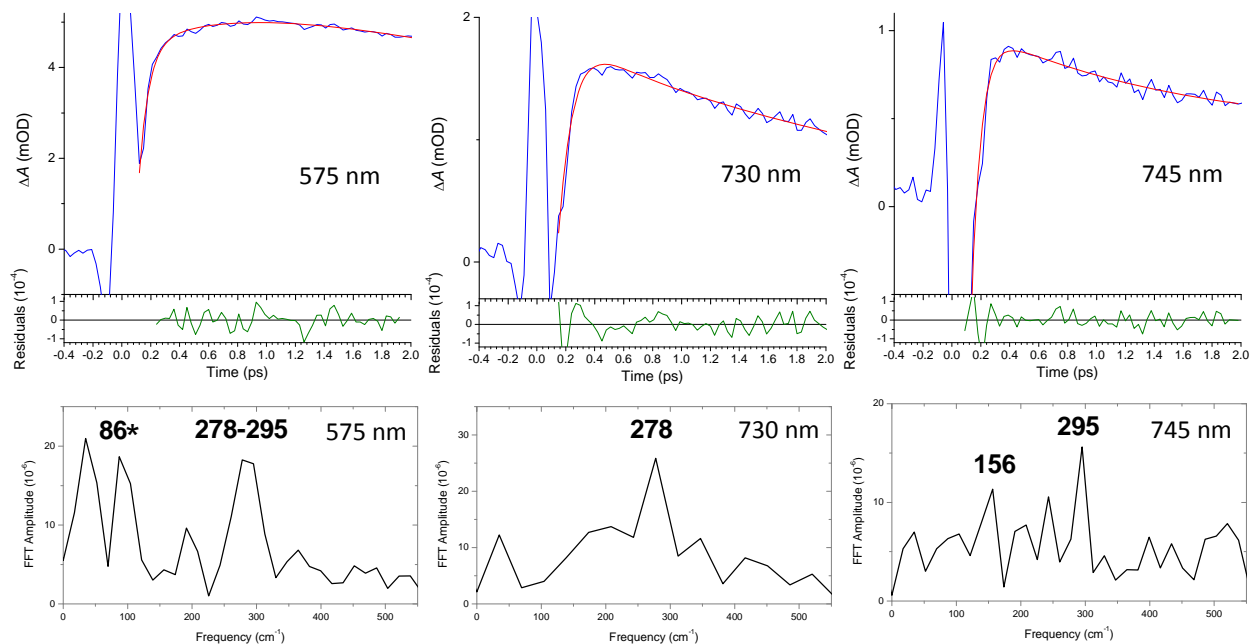

**Figure S7a.** Aqueous  $\text{IrCl}_6^{2-}$ , 600-nm excitation: the  $\Delta A$  kinetic traces at several probe wavelengths (blue), the multiexponential fits (red), and the fit residuals (green). The FFT spectra of the residuals are dominated by the  $287 \pm 9 \text{ cm}^{-1}$  band due to the  $\text{IrCl}_6^{2-}$  ground-state wavepackets induced via ISRS (Raman  $e_g$  mode:  $290\text{-}293 \text{ cm}^{-1,2}$ , Table S1). An asterisk marks the  $86 \text{ cm}^{-1}$  FFT band also observed in the flow cell filled with neat water.

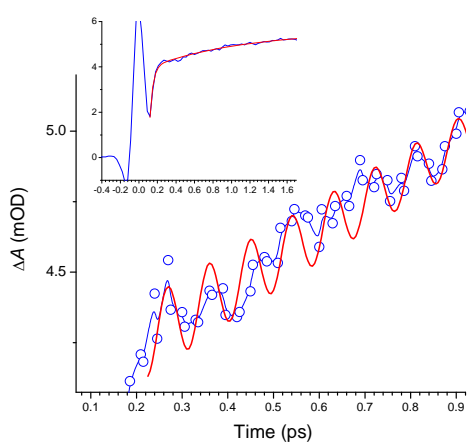

**Figure S7b.**  $\text{IrCl}_6^{2-}$  in acetonitrile, 600-nm excitation. The representative 605-nm  $\Delta A$  kinetic trace illustrates the coherent modulation persisting for about two picoseconds. This oscillation is best modeled by a  $350 \text{ cm}^{-1}$  frequency (red), which matches the frequency of the  $a_{1g}$  Raman-active mode of ground-state  $\text{IrCl}_6^{2-}$  ( $345 \text{ cm}^{-1}$ , acetonitrile<sup>1</sup>), and therefore, is assigned to ground-state wavepackets produced via ISRS. Excitation of this mode is not efficient because of the small bandwidth of the  $\sim 70\text{-}75 \text{ fs}$  excitation pulse ( $220 \text{ cm}^{-1}$ , fwhm). Oscillations at lower frequencies were not observed.



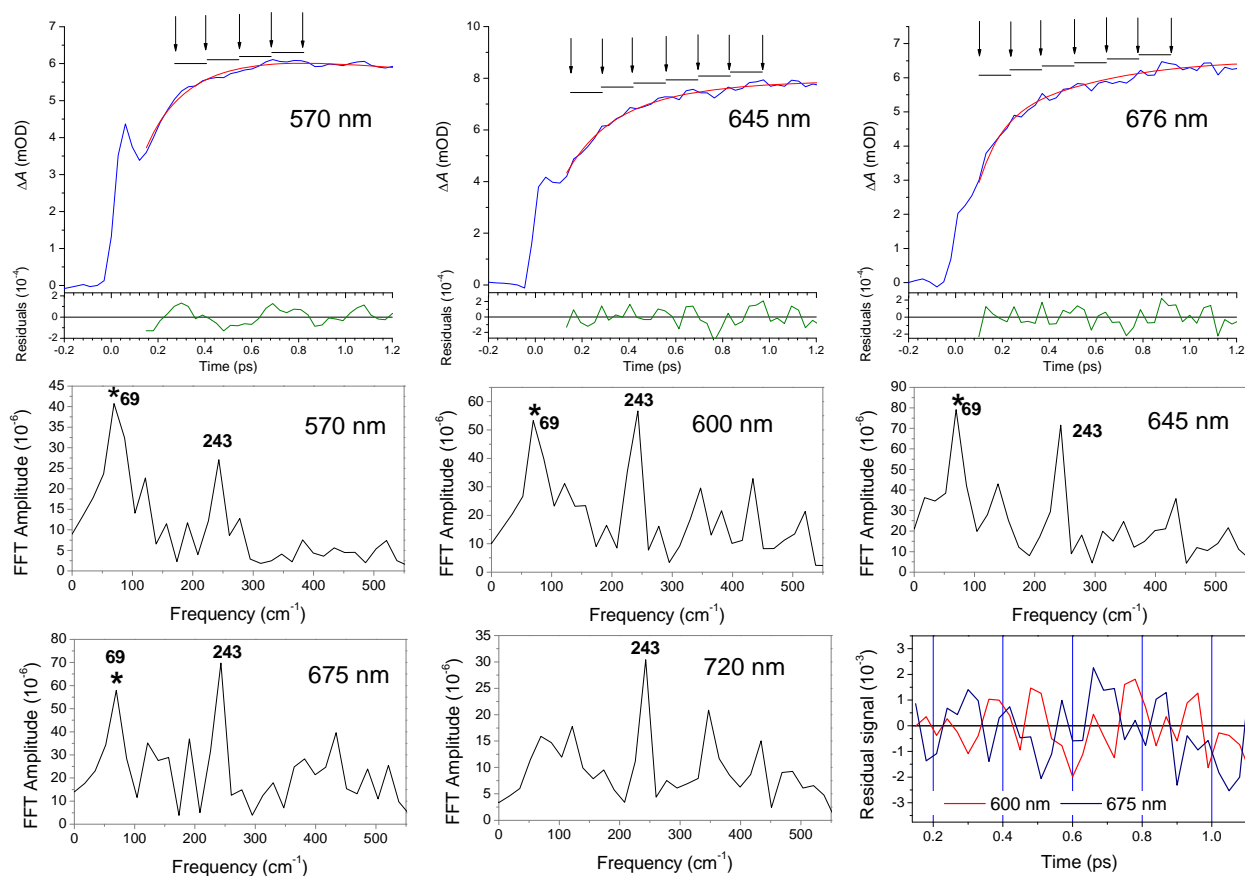

**Figure S8.** Aqueous  $\text{IrCl}_6^{2-}$ , 490-nm excitation: the representative short-time 570-, 645- and 676-nm  $\Delta A$  kinetic traces (blue; solvent contribution subtracted), the multiexponential fits (red) and the fit residuals (green). The horizontal time intervals trace the oscillation maxima of the  $243 \text{ cm}^{-1}$  Jahn-Teller mode, which has a delayed ( $\sim 100 \text{ fs}$ ) appearance. This mode is further illustrated by FFT spectra of multiexponential fit residuals of the  $\Delta A$  kinetic traces at several probe wavelengths (570, 600, 645, 675, and 720 nm). Asterisks mark the FFT  $69 \text{ cm}^{-1}$  signals also observed in transient absorption data measured for the flow cell filled with neat water under the same conditions. The bottom-right panel illustrates the  $\sim \pi$  shift (out-of-phase) between the oscillations detected in the blue and red wings (600 and 675 nm) of the 620 nm product transient absorption band, as expected for the oscillations which arise due to vibrational coherence.

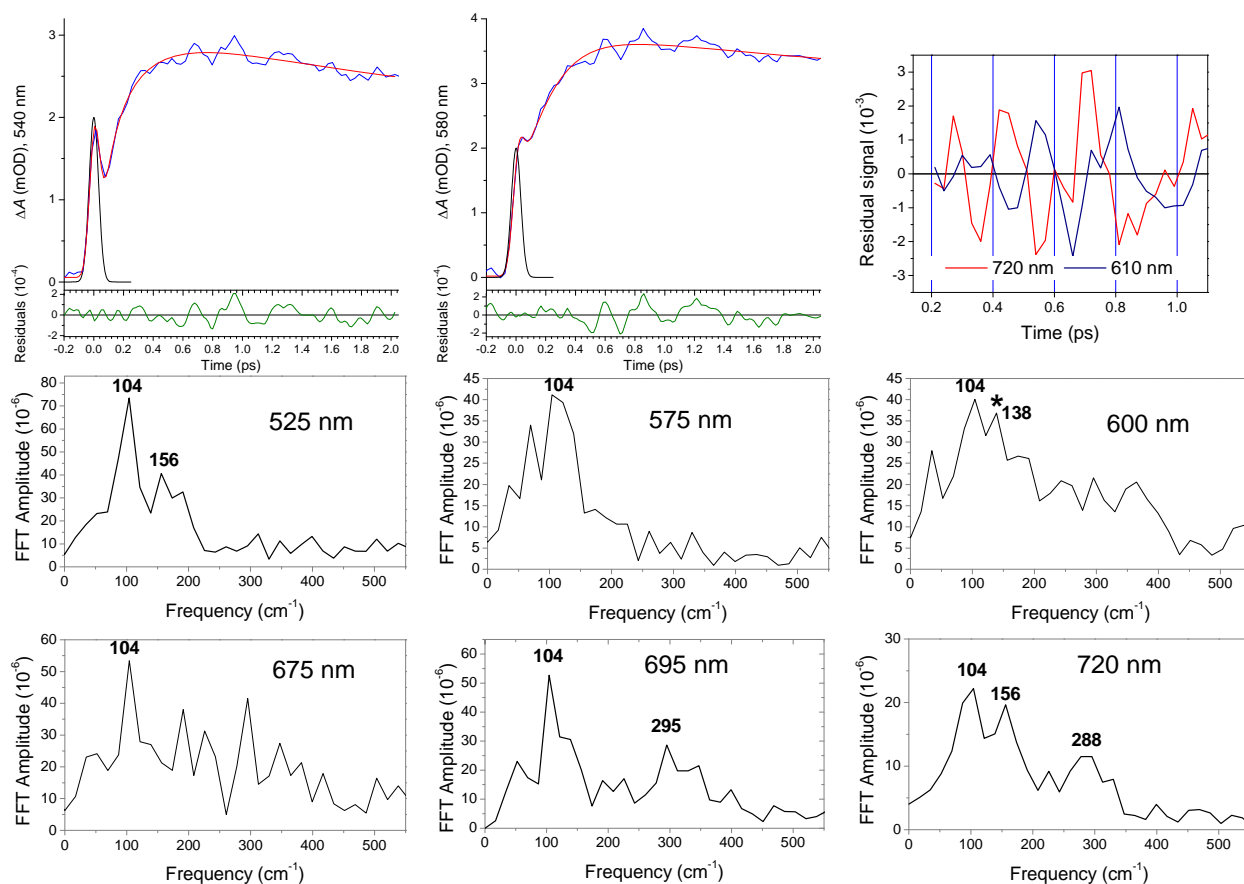

**Figure S9.** Aqueous  $\text{IrCl}_6^{2-}$ , 420 nm excitation. Top: the 540- and 580-nm  $\Delta A$  kinetic traces (blue; solvent subtracted), the multiexponential fits (red) with CCF deconvolution (80 fs CCF fwhm, black), and the fit residuals (green), see also the 525 and 720 nm  $\Delta A$  data (Fig. 6, main text). The top-right panel illustrates the  $\sim\pi$  shift (out-of-phase) between the oscillations detected in the blue and red wings (610 and 720 nm) of the 620 nm  $\Delta A$  product band, as expected for the oscillations arising due to vibrational coherence. The apparent beat irregularity is caused by the superposition of the water signal at short times and the 156 and 288-295  $\text{cm}^{-1}$  ISRS-induced  $\text{IrCl}_6^{2-}$  ground-state oscillations (bottom-right 720-nm FFT spectrum;  $\text{IrCl}_6^{2-}$  Raman modes: 160 and 293  $\text{cm}^{-1}$ ). Middle and bottom: FFT spectra of fit residuals of the  $\Delta A$  kinetic traces are dominated by the Jahn-Teller 104  $\text{cm}^{-1}$  mode. An asterisk marks the FFT 138  $\text{cm}^{-1}$  signal also observed for the flow cell filled with neat water under the same experimental conditions.

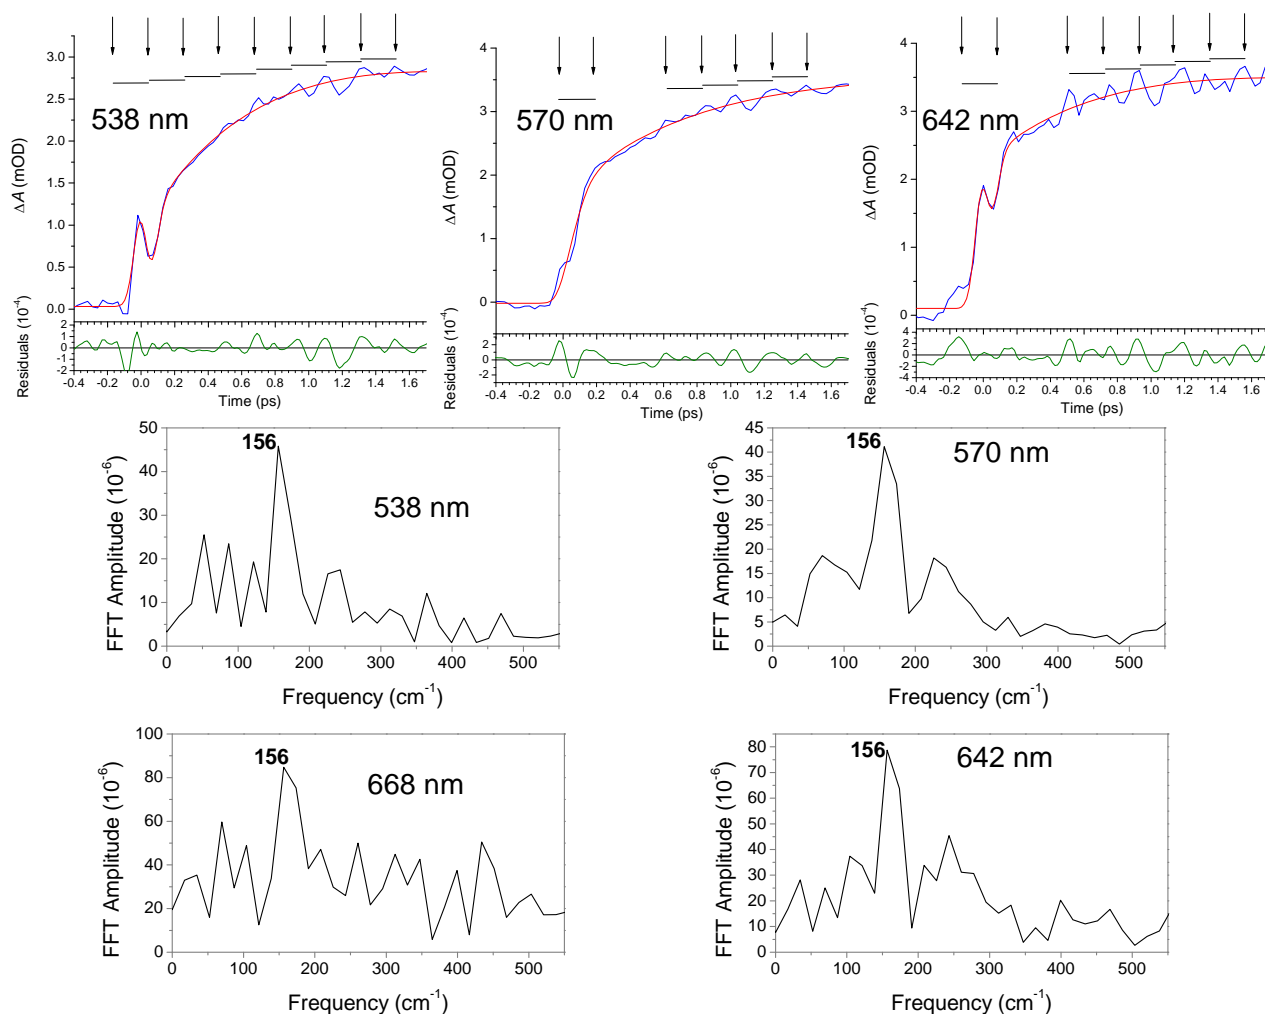

**Figure S10.** 420 nm excitation of  $\text{IrCl}_6^{2-}$  in acetonitrile: the short-time 538-, 570- and 642-nm  $\Delta A$  kinetic traces (solvent contribution subtracted), the multiexponential fits (red) with CCF deconvolution (100 fs fwhm, black), and the fit residuals (green). FFT spectra of fit residuals at several probe wavelengths yield the  $156 \text{ cm}^{-1}$  band, which frequency matches that of the Raman-active mode of ground-state  $\text{IrCl}_6^{2-}$  ( $161 \text{ cm}^{-1}$ , acetonitrile<sup>1</sup>) and which, therefore, is assigned to ground-state wavepackets excited through ISRS. The horizontal time intervals (top panels) trace the oscillation maxima of the  $156 \text{ cm}^{-1}$  mode and show that its origin can be traced to the negative delay times, as expected for ISRS oscillations. This  $156 \text{ cm}^{-1}$  oscillation is observed in addition to the  $104 \text{ cm}^{-1}$  coherent oscillation due to Jahn-Teller effect, Fig. 6, main text.

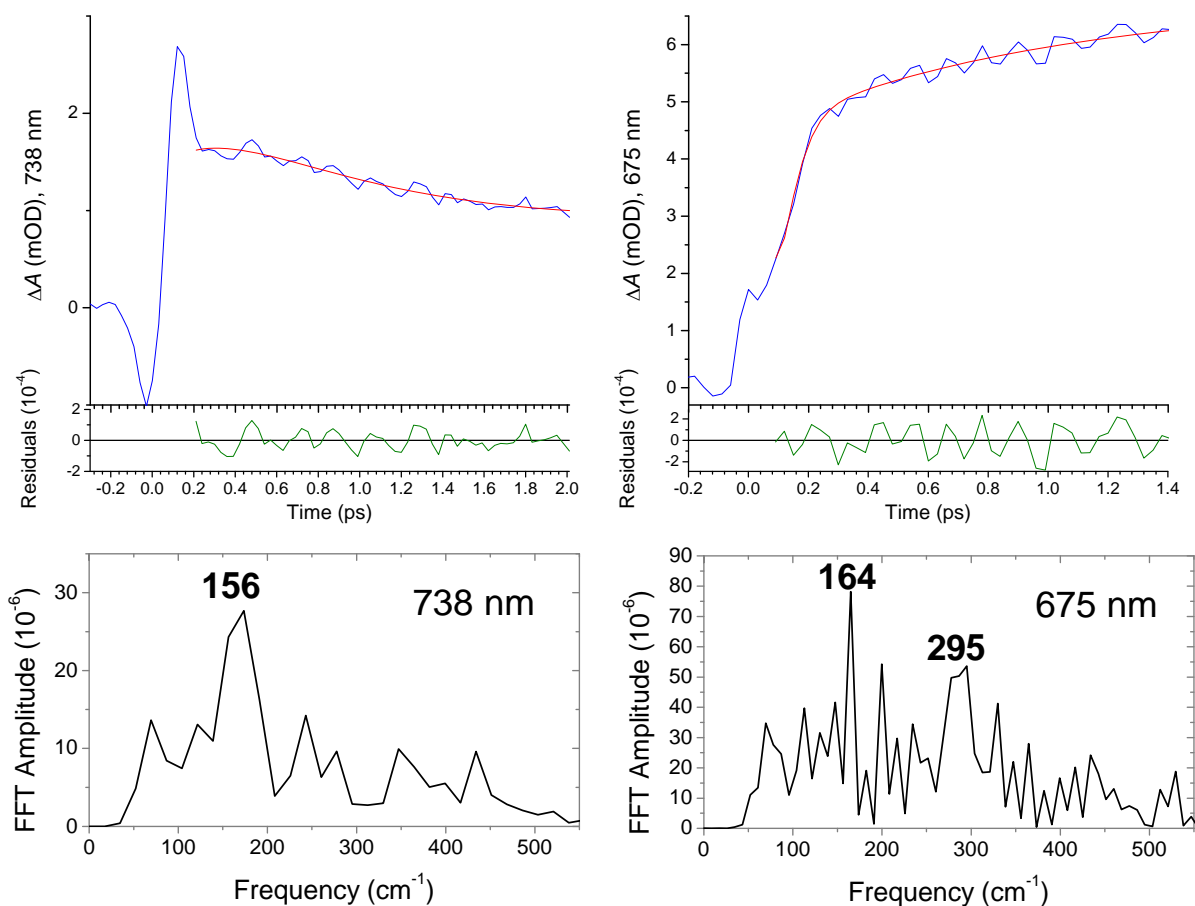

**Figure S11.** 490-nm excitation of  $\text{IrCl}_6^{2-}$  in water (left) and acetonitrile (right). The FFT spectra of the multiexponential fit residuals of the 738 nm (left) and 675 nm (right)  $\Delta A$  kinetic traces (the solvent contribution (present from -100 to 100 fs) not subtracted) show the 156  $\text{cm}^{-1}$  and 164 and 295  $\text{cm}^{-1}$  bands assigned to ISRS-induced ground-state wavepacket motion ( $\text{IrCl}_6^{2-}$  Raman modes: 160 and 293  $\text{cm}^{-1}$  <sup>1,2</sup>, see Table S1). For 490-nm excitation of  $\text{IrCl}_6^{2-}$  in water, see also Fig. S8.

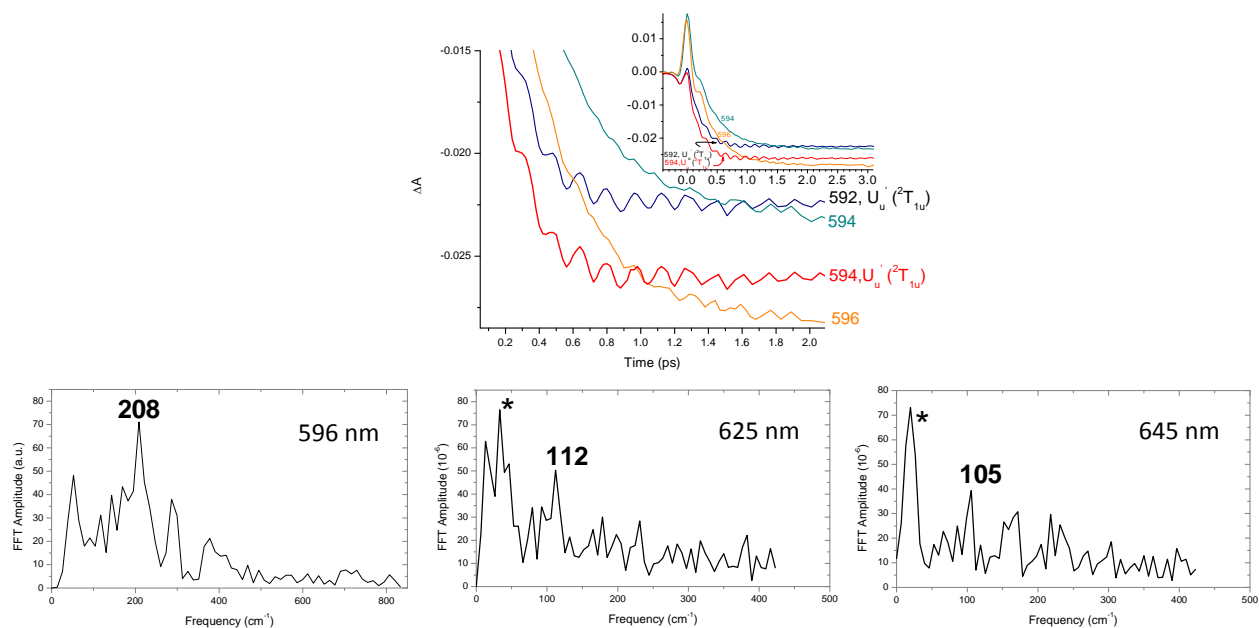

**Figure S12.** 602-nm  $E_u''(^2T_{1u})$   $\text{IrBr}_6^{2-}$  excitation in acetonitrile. The 208  $\text{cm}^{-1}$  oscillations due to  $\text{IrBr}_6^{2-}$  ISRS (top, 594- and 596-nm  $\Delta A$  kinetic traces) are similar to those observed in the previous work<sup>3</sup> (top, 592 and 594 nm probe wavelengths, excitation of  $\text{IrBr}_6^{2-}$  into  $U_u'(^2T_{1u})$ , see Fig. 10A in ref. [3]; resonance Raman measurements yielded the 208  $\text{cm}^{-1}$  mode,<sup>2,4</sup> see also Table S1.) The FFT spectra of multiexponential fit residuals of the  $\Delta A$  kinetic traces at several representative probe wavelengths show the 208  $\text{cm}^{-1}$  ISRS band and only traces of 104-121  $\text{cm}^{-1}$  signals, which were intense in the previous work<sup>3</sup> upon excitation into  $U_u'(^2T_{1u})$ , and were attributed to the Jahn-Teller  $t_{2g}$  mode.

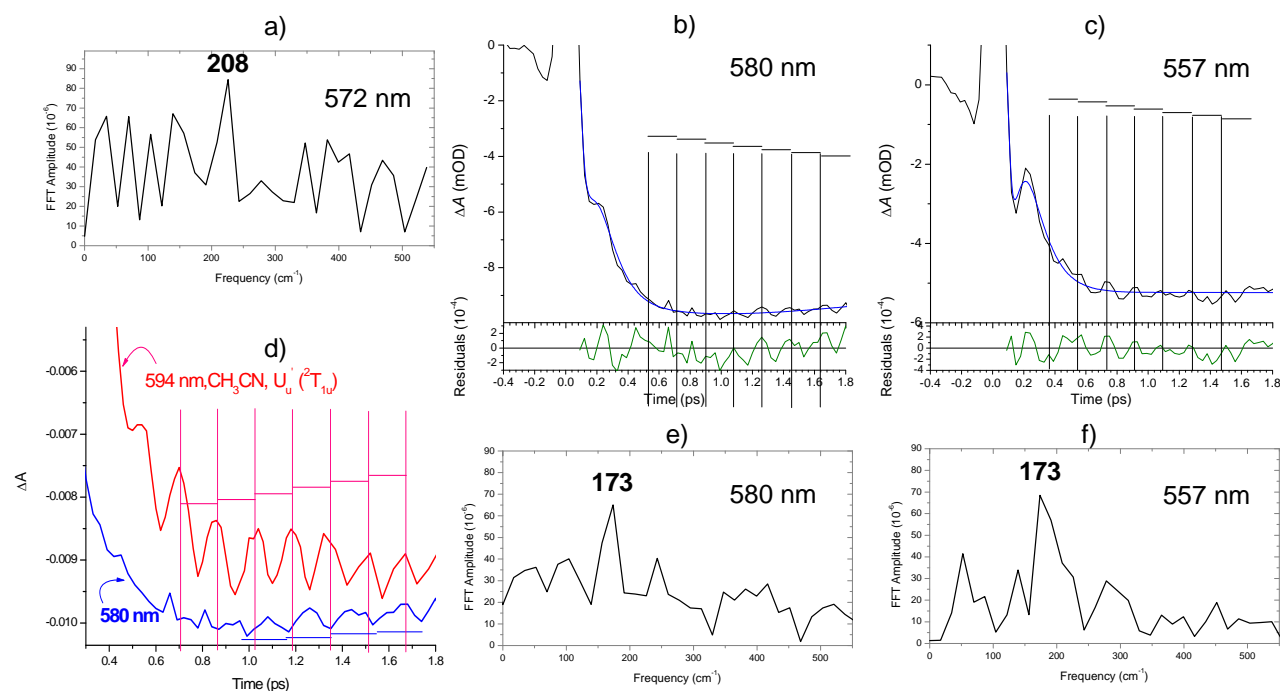

**Figure S13.** 602-nm  $E_u''(^2T_{1u})$   $\text{IrBr}_6^{2-}$  excitation in water: the FFT spectra of multiexponential fit residuals of the  $\Delta A$  kinetic traces show a  $208\text{ cm}^{-1}$  ISRS band (a), similar to acetonitrile solutions in Fig. S12. The comparison of the data in water (d, blue) with  $U_u'(^2T_{1u})$ -excited  $\text{IrBr}_6^{2-}$  in acetonitrile, where the horizontal time intervals (red) trace the oscillation maxima of the  $208\text{ cm}^{-1}$  ISRS-induced mode, shows that the oscillations at a smaller frequency are also present. The FFT spectra of the multiexponential fit residuals of the representative 580- and 557 nm  $\Delta A$  kinetic traces (b and c) show a  $173\text{ cm}^{-1}$  band (e and f), which frequency matches the  $174\text{ cm}^{-1}$  Raman mode of aqueous  $\text{IrBr}_6^{2-}$ <sup>2,4</sup> and which, therefore, is assigned to ground-state wavepacket induced through ISRS. Oscillations at smaller frequencies (e.g.,  $125\text{ cm}^{-1}$  Jahn-Teller mode, ref. [3]) were not detected. In windows b) and c), the horizontal time intervals trace the oscillation maxima of the  $173\text{ cm}^{-1}$  ISRS mode.

**Table S1.** Vibrational frequencies of  $\text{IrCl}_6^{2-}$  and  $\text{IrBr}_6^{2-}$  observed in the current work and reported in literature.

|                      | Frequencies ( $\text{cm}^{-1}$ )<br>acetonitrile solution |                                         | Frequencies ( $\text{cm}^{-1}$ )<br>aqueous solution |                                                        |
|----------------------|-----------------------------------------------------------|-----------------------------------------|------------------------------------------------------|--------------------------------------------------------|
|                      | This work                                                 | Known Raman<br>modes from<br>literature | This work ( $\text{cm}^{-1}$ )                       | Known Raman<br>modes from<br>literature                |
| $\text{IrCl}_6^{2-}$ |                                                           |                                         |                                                      |                                                        |
| 600 nm               | 350 <sup>c</sup>                                          | 161, 290, 341 <sup>b</sup>              | 156, 287 <sup>c</sup>                                | 160, 293, 345 <sup>a</sup>                             |
| 490 nm               | 164, 295 <sup>c</sup>                                     |                                         | 156, 295 <sup>c</sup><br>243 <sup>d</sup>            |                                                        |
| 420 nm               | 156 <sup>c</sup>                                          |                                         | 156, 295 <sup>c</sup><br>104 <sup>d</sup>            |                                                        |
| $\text{IrBr}_6^{2-}$ |                                                           |                                         |                                                      |                                                        |
| 602 nm               | 208 <sup>c</sup><br><br><i>f</i>                          | 208 <sup>e</sup>                        | 173, 208<br><br><i>f</i>                             | 97, 174, 210 <sup>a</sup><br>97, 177, 212 <sup>g</sup> |

<sup>a</sup> Ref. [2]. <sup>b</sup> Ref [1]. <sup>c</sup> Assigned to ISRS-excited ground-state modes. <sup>d</sup> Assigned to Jahn-Teller modes ( $t_{2g}$ -like, 104  $\text{cm}^{-1}$ ;  $e_g$ -like, 243  $\text{cm}^{-1}$ ). <sup>e</sup> Ref. [3]. <sup>f</sup> 104  $\text{cm}^{-1}$  oscillations in acetonitrile and 125  $\text{cm}^{-1}$  oscillations in aqueous solutions assigned to the Jahn-Teller  $t_{2g}$ -like mode; excitation into  $U_u'({}^2T_{1u})$  and  $U_u'({}^2T_{2u})$  states, ref. [3]. <sup>g</sup> Ref. [4]

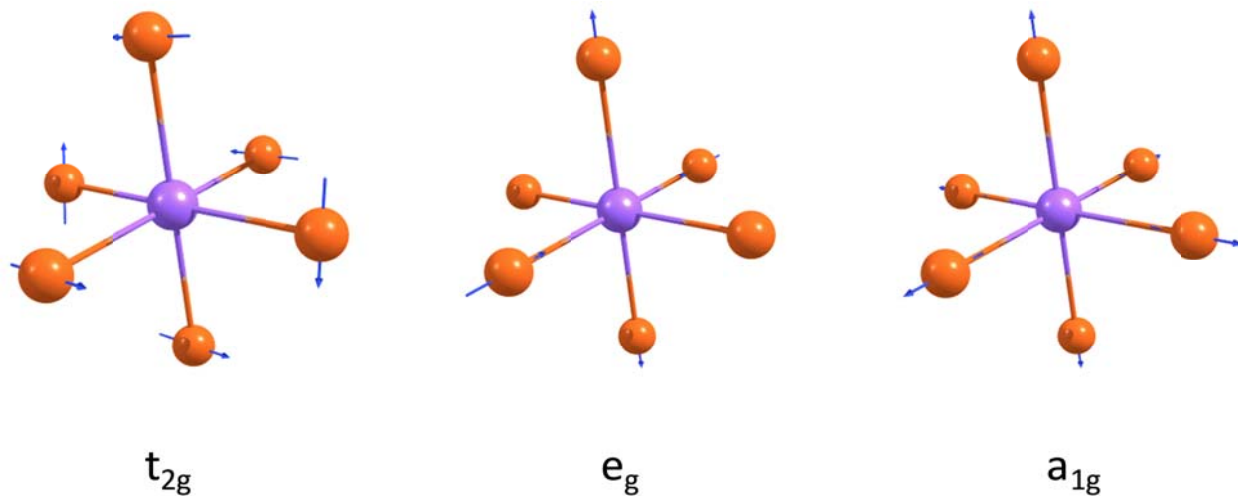

**Figure S14.** Nuclear motion in  $\text{IrCl}_6^{2-}$  and  $\text{IrBr}_6^{2-}$  octahedral complexes corresponding to Raman- and Jahn-Teller-active  $t_{2g}$  bending (triply degenerate),  $e_g$  out-of-phase stretching (doubly degenerate), and  $a_{1g}$  totally symmetric stretching modes.



## References

1. H. Hamaguchi and T. Shimanouchi, *Chem. Phys. Lett.*, 1975, **32**, 103.
2. Y. M. Bosworth and R. J. H. Clark, *J. Chem. Soc. Dalton Trans.*, 1974, **5**, 1749.
3. S. M. Matveev, D. S. Budkina, I. L. Zheldakov, M. R. Phelan, C. M. Hicks and A. N. Tarnovsky, *J. Chem. Phys.*, 2019, **150**, 054302.
4. H. Hamaguchi and T. Shimanouchi, *Chem. Phys. Lett.*, 1976, **38**, 370.
